# Supplementary material for: Macrophages and neutrophils are the targets for immune suppression by glucocorticoids in contact allergy
Source: JCI journal article supplement (doi:10.1172/jci28034), 2007-05-01
Supplement: sd1 [file 1]

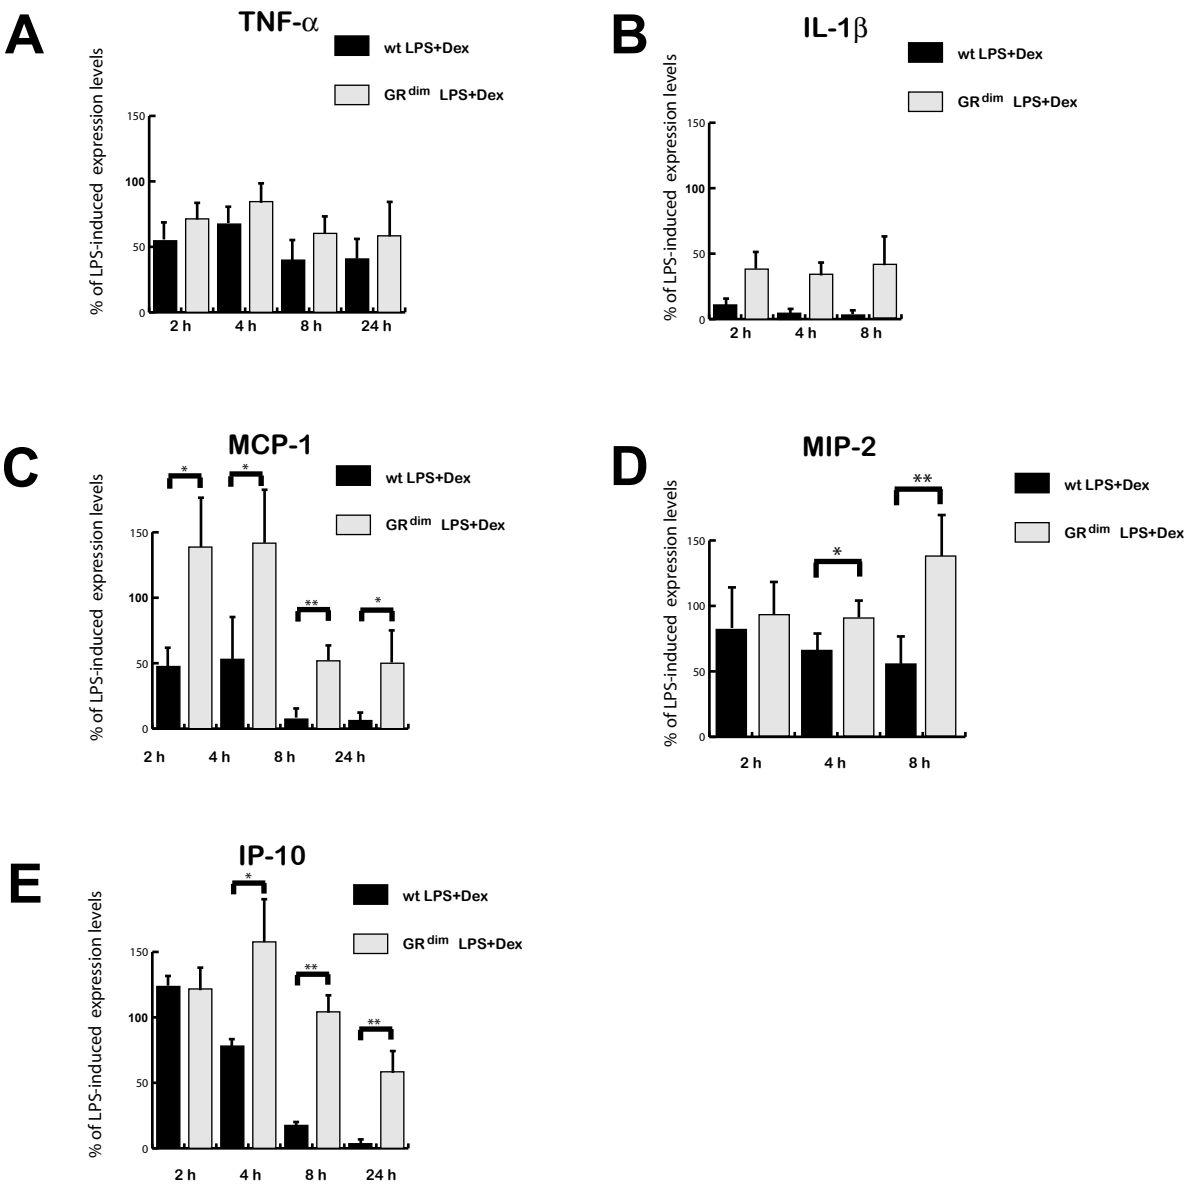

**Supplementary Figure 1: GC-mediated regulation of mRNA expression in LPS-activated bone marrow-derived macrophages of wild-type and GR<sup>dim</sup> mice.** BM-derived macrophages were treated with LPS or LPS + dexamethasone at indicated time points and mRNA expression was determined by quantitative RT-PCR. Results were normalized to LPS-induced gene expression levels. mRNA expression levels in LPS+Dex-treated cells are depicted as the percentage of LPS-induced mRNA expression for *Tnf* (TNF- $\alpha$ ) (**A**), *Il1b* (IL-1 $\beta$ ) (**B**), *Ccl2* (MCP-1) (**C**), *Cxcl2* (MIP-2) (**D**) and *Cxcl10* (IP-10) (**E**). Statistical analysis comprises at least three independent experiments. \*,  $p < 0.05$ ; \*\*,  $p < 0.01$ .
